# Supplementary material for: Pollution Characteristics and Source Apportionment of Black Carbon Aerosols during Spring in Beijing
Source: MDPI journal article supplement (doi:10.3390/toxics12030202), 2024-03-05
Supplement: s1 [file s1]

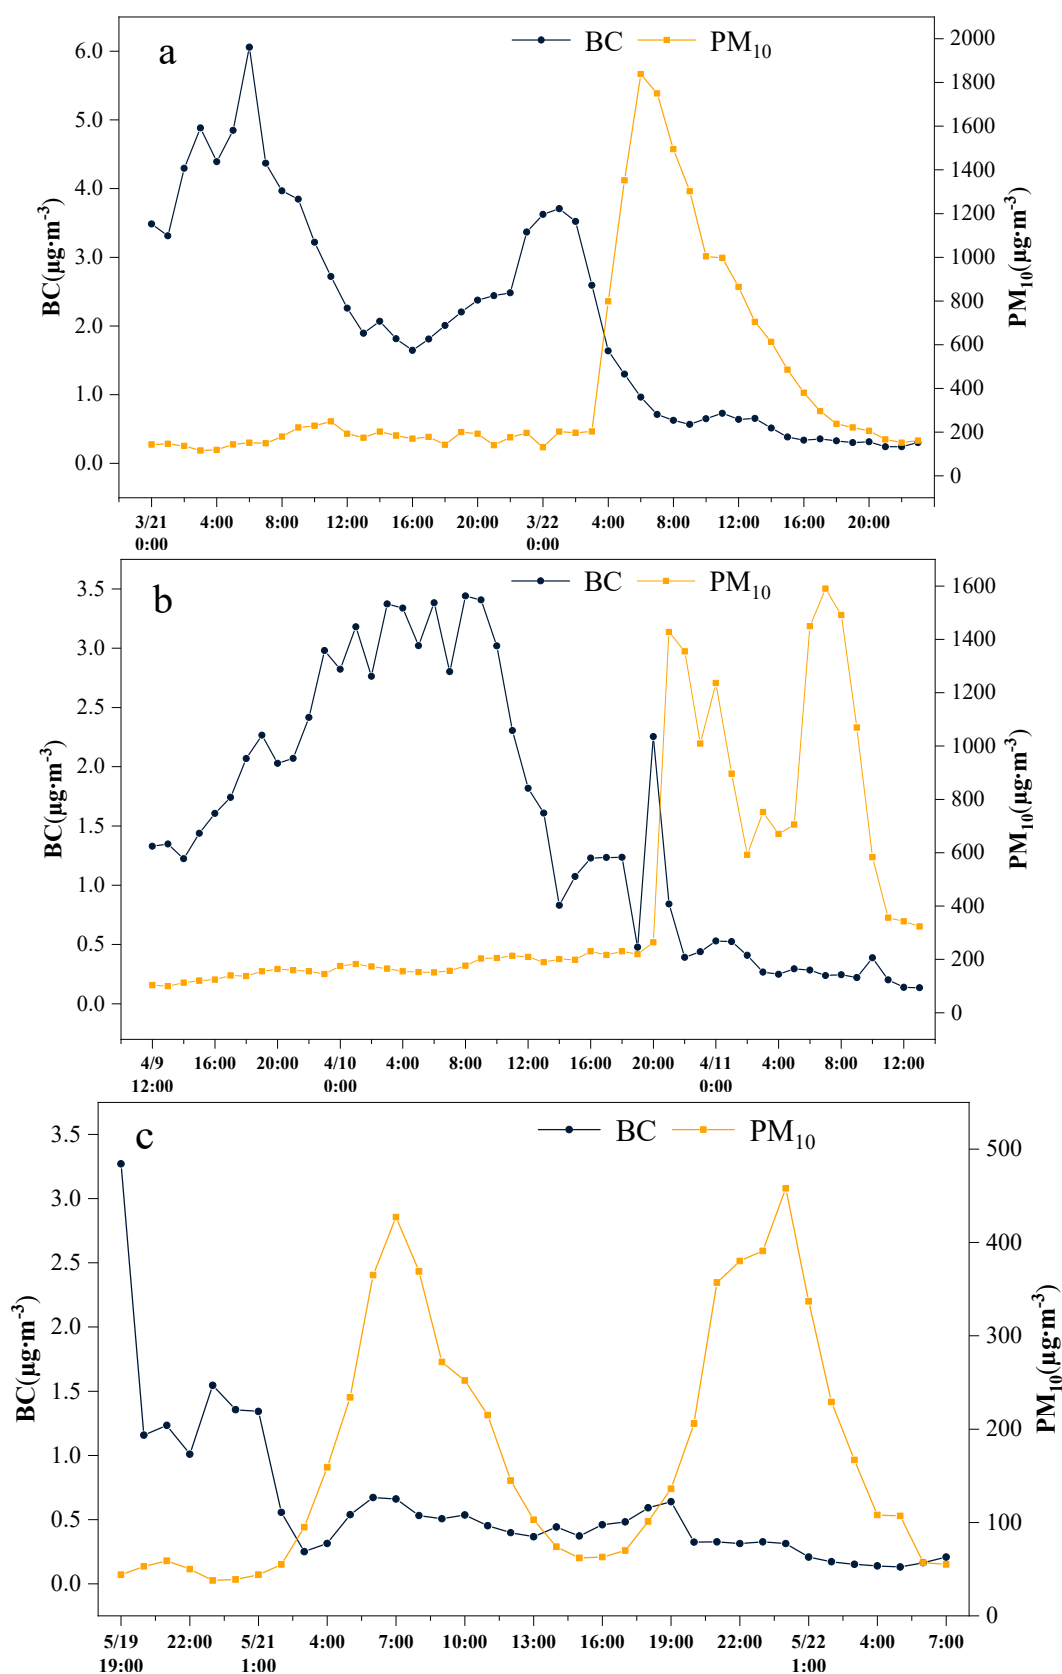

Figure S1. The Mean hourly concentration trend of BC and PM<sub>10</sub> in the three dust events (a) 0:00, 21 March–23:00 22 March; (b) 12:00, 9 April–13:00, 11 April; (c) 19:00, 19 May–7:00, 22 May.
